# Supplementary material
Source: HighWire-hosted journal article supplement (https://ijgc.bmj.com/highwire/filestream/32214/field_highwire_adjunct_files/0/ijgc-2023-004671supp001_data_supplement.pdf)
Supplement: ijgc-2023-004671supp001_data_supplement.pdf [file ijgc-2023-004671supp001_data_supplement.pdf]

## Supplementary

**Figure S1:** (A) Marginal variable effect on disease-free survival probability. The variable status “0” indicates the absence of the parameters required to define the feature. For continuous variables, the values indicated on the x-axis have been normalized and do not indicate the actual feature value. The y-axis indicated the disease-free survival probability. The x-axis rug represents the number of samples that represent the interval, therefore the robustness of the variable marginal effect for a given range of values. Ranges above the starting value (y value at  $x=0$ ) are associated to a positive prognostic effect for that given feature. (B) Variable importance predictor coefficient for each selected feature. Higher median values are associated to a higher average impact on predictions.

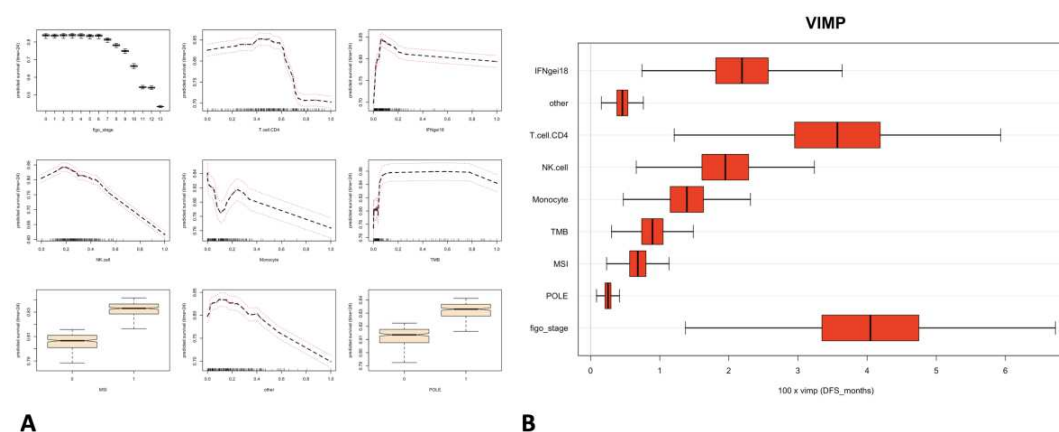

**Figure S2:** Comparison of cell abundances distributions in multiple in-silico deconvolution tools for shared cell populations.

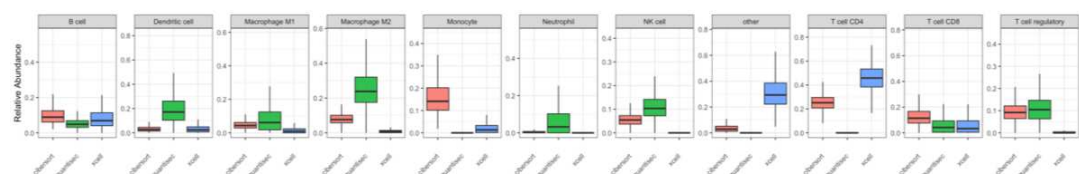

**Figure S3:** (A) Gene correlation network characterized relapse early stages with node size equals to 1% of the node degree. (B) Gene correlation network no-relapse early stages with node size equals to 1% of the node degree. (C) Gene correlation network unexplained relapse early stages with node size equals to 1% of the node degree.

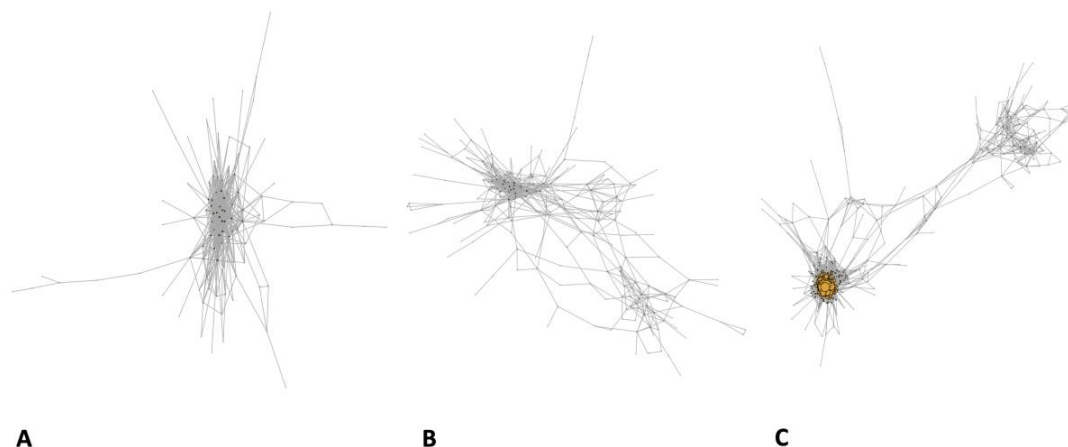

**Table S1:** In-silico deconvolution tools aggregation schema. Immune cells sub-types have been aggregated to allow for comparison.

| quanTIsec                   | CIBERSORTx                                                                                             | xCell                                                                                                                                             | Variation |
|-----------------------------|--------------------------------------------------------------------------------------------------------|---------------------------------------------------------------------------------------------------------------------------------------------------|-----------|
| <b>T cells CD4+</b>         | T cells CD4 naive, T cells CD4 memory resting, T cells CD4 memory activated, T cells follicular helper | T cell CD4+ Th1, T cell CD4+ Th2, T cell CD4+ naive, T cell CD4+ memory, T cell CD4+ central memory, T cell CD4+ effector memory                  | 8.9 %     |
| <b>T cells CD8+</b>         | T cells CD8                                                                                            | T cell CD8+ effector memory, T cell CD8+ central memory, T cell CD8+ naive                                                                        | 0.5%      |
| <b>Natural killer cells</b> | NK cells resting, NK cells activated                                                                   | NK cells                                                                                                                                          | 0.1%      |
| <b>Tregs</b>                | T cells regulatory                                                                                     | T cell regulatory                                                                                                                                 | 0.03%     |
| <b>Neutrophils</b>          | Neutrophils                                                                                            | Neutrophils                                                                                                                                       | 0.003 %   |
| <b>Dendritic cells</b>      | Dendritic cells resting, Dendritic cells activated                                                     | Myeloid dendritic cell, Plasmacytoid dendritic cell                                                                                               | 0.07 %    |
| <b>Monocytes</b>            | Monocytes, Macrophages M0                                                                              | Macrophages, Monocytes, Granulocyte-monocyte progenitor                                                                                           | 0.8%      |
| <b>Macrophage M1</b>        | Macrophages M1                                                                                         | Macrophages M1                                                                                                                                    | 0.06%     |
| <b>Macrophage M2</b>        | Macrophages M2                                                                                         | Macrophages M2                                                                                                                                    | 0.02%     |
| <b>B cells</b>              | B cells naive, B cells memory, Plasma cells                                                            | B cell plasma, Class-switched memory B cell, B cell memory, B cell naive                                                                          | 0.4 %     |
| -                           | T cells gamma delta, Mast cells resting, Eosinophils                                                   | T cell NK, Common lymphoid progenitor, Common myeloid progenitor, Eosinophil, Granulocyte-monocyte progenitor, Hematopoietic stem cell, Mast cell | 3.8%      |

**Table S2:** Immune signature genes.

| Name | Genes |
|------|-------|
|------|-------|

---

|                                        |                                                                                                                                                                                                                                                                                                                                    |
|----------------------------------------|------------------------------------------------------------------------------------------------------------------------------------------------------------------------------------------------------------------------------------------------------------------------------------------------------------------------------------|
| <b>IFN<math>\gamma</math> extended</b> | CD3D,IL2RG,NKG7,CIITA,HLA-E,CD3E,CXCR6,CCL5,LAG3,TAGAP,GZMK,CD2,IDO1,CXCL10,HLA-DRA,STAT1,CXCL13,GZMB                                                                                                                                                                                                                              |
| <b>TGF<math>\beta</math></b>           | ACTA2, ACTG2, ADAM12, ADAM19, CNN1, COL4A1, CTGF, CTPS1, FAM101B, FSTL3, HSPB1, IGFBP3, PXDC1, SEMA7A, SH3PXD2A, TAGLN, TGFB1, TNS1, TPM1                                                                                                                                                                                          |
| <b>MPS</b>                             | AKR1C3, BMP1, CRTAC1, ECEL1, ERC2, FAM110C, FUT9, GABRA2, GAP43, GREM1, HECW1, KLHL1, KRT12, LHFPL4, NEFL, NEFM, NETO1, NKX2-2, NSG2, OCIAD2, OTOPI, PDE3B, PTPRN2, PTPRT, SIGLEC15, SLC13A5, SLC9A2, SLITRK6, SNAP91, STON2, TAC1, VAT1L, WNT5A, ALX1, BRD7, DTD1, GRSF1, HCN1, LTA4H, OXCT1, PATJ, PLXNC1, SSBP4, TELO2, TMEM177 |
| <b><math>\beta</math>Catenin</b>       | AKR1C3,BMP1,CRTAC1, ECEL1, ERC2, FAM110C, FUT9, GABRA2, GAP43, GREM1, HECW1, KLHL1, KRT12, LHFPL4, NEFL, NEFM, NETO1, NKX2-2, NSG2, OCIAD2, OTOPI, PDE3B, PTPRN2, PTPRT, SIGLEC15, SLC13A5, SLC9A2, SLITRK6, SNAP91, STON2, TAC1, VAT1L, WNT5A, ALX1, BRD7, DTD1, GRSF1, HCN1, LTA4H, OXCT1, PATJ, PLXNC1, SSBP4, TELO2, TMEM177   |

---
